# Supplementary material for: Spinal-pelvic sagittal parameters in patients with gluteal muscle contracture: an imaging study
Source: PeerJ. 2022 Mar 15;10:e13093. doi: 10.7717/peerj.13093 (PMC8932307; doi:10.7717/peerj.13093)
Supplement: Supplemental Information 1 [file peerj-10-13093-s001.xlsx]

## Sheet: GMC
No.	sex	age	SVA(mm)		average	TK(5-12)		average	LL		average	PI		average	PT		average	SS		average	apex	PI-LL	LBP	vas
NO.1	M	31	14.41	12.2	13.305	7.6	8	7.8	44	44.2	44.1	38.7	36.7	37.7	-3.8	-4.7	-4.25	40.2	44.3	42.25	3	-6.4
NO.2	F	23	40.52	42.56	41.54	31.8	30.7	31.25	56.5	60.4	58.45	63.3	58.8	61.05	16.8	17	16.9	46.3	44	45.15	3	2.6
NO.3	F	17	22.26	19.73	20.995	19.1	18	18.55	47.6	48.7	48.15	56.4	61.1	58.75	17.6	20.9	19.25	38.7	38.7	38.7	3	10.6	✔	3
NO.4	F	24	21.61	19.63	20.62	15.9	16.5	16.2	46.3	42.7	44.5	47.5	43.2	45.35	8.1	10.1	9.1	36	35	35.5	3	0.85
NO.5	F	29	14.76	16.67	15.715	10.3	10.1	10.2	39.2	41	40.1	44.4	46	45.2	14.1	13.3	13.7	30.3	34.1	32.2	3	5.1
NO.6	F	23	-23.81	-23.8	-23.805	11	9.8	10.4	46.1	48.4	47.25	38	38.1	38.05	1	1.7	1.35	37.6	35.8	36.7	3	-9.2
NO.7	F	29	14.7	13.11	13.905	12	11.8	11.9	39.1	36.8	37.95	39.1	36.8	37.95	5.2	3.9	4.55	32.6	32.7	32.65	4	0
NO.8	F	28	44.89	48.71	46.8	44.4	43.3	43.85	53.7	57.1	55.4	57.1	61	59.05	14	17.2	15.6	44.3	41.7	43	4	3.65	✔	3
NO.9	F	32	-41.14	-41.15	-41.145	18.7	21	19.85	48.5	46.6	47.55	39.2	37	38.1	8.8	8.7	8.75	31	28.5	29.75	4	-9.45
NO.10	F	23	37.53	34.5	36.015	20	22.1	21.05	44	40.8	42.4	39.2	37.9	38.55	2.9	2.6	2.75	33.3	36.2	34.75	4	-3.85
NO.11	F	26	-37.8	-37.6	-37.7	19.4	19.2	19.3	44.4	41.5	42.95	46.5	50.4	48.45	7.6	8.6	8.1	39	39.2	39.1	4	5.5
NO.12	F	34	-76.51	-81.7	-79.105	5	6.1	5.55	41.7	39.1	40.4	35.6	34.2	34.9	6.1	5.7	5.9	30	29	29.5	4	-5.5	✔	3
NO.13	M	29	-24.01	-21.07	-22.54	35	34.9	34.95	62	64.3	63.15	47.5	47.6	47.55	1	0	0.5	45.5	47.3	46.4	4	-15.6
NO.14	M	26	15.26	13.04	14.15	23.4	20.8	22.1	37.4	40.9	39.15	26	25.9	25.95	-1.6	-1.3	-1.45	27.6	27.1	27.35	4	-13.2
NO.15	F	24	16.68	13.57	15.125	10.9	12	11.45	20.1	21.8	20.95	33.6	36.7	35.15	18.8	17.4	18.1	18.4	17.9	18.15	4	14.2
NO.16	M	34	0.05	0.1	0.075	21.2	21.3	21.25	32.1	32	32.05	38.9	37.7	38.3	12.9	12.7	12.8	25.7	26	25.85	4	6.25
NO.17	F	25	-38.9	-41.1	-40	14.3	17.7	16	55.2	58.6	56.9	36.6	34.8	35.7	-7.1	-6.2	-6.65	41.6	42.2	41.9	4	-21.2	✔	3
NO.18	F	32	-17.96	-18	-17.98	1.5	1.4	1.45	39.5	41.4	40.45	47.1	51.2	49.15	12.7	14.4	13.55	34.4	34.8	34.6	4	8.7
NO.19	M	23	-71.61	-67.12	-69.365	26	23.6	24.8	57.6	55	56.3	52	57.2	54.6	18.9	16.6	17.75	37.5	37.3	37.4	4	-1.7
NO.20	F	27	-5	-4.33	-4.665	15.6	14.5	15.05	44.7	42.9	43.8	43.5	40.3	41.9	5.7	6.1	5.9	35	36.8	35.9	4	-1.9
NO.21	F	26	15.07	17.43	16.25	6.4	5.3	5.85	40	44	42	46.5	48.9	47.7	8.8	9.9	9.35	37.6	38.9	38.25	4	5.7
NO.22	M	18	20.3	22.33	21.315	16.1	17	16.55	57.5	52.8	55.15	59.4	55	57.2	13.2	14.7	13.95	42	44.7	43.35	4	2.05
NO.23	M	27	7.38	7.55	7.465	30.9	34.1	32.5	49.1	47.2	48.15	41	39.9	40.45	11.8	11.5	11.65	29	29.1	29.05	4	-7.7
NO.24	F	26	35.1	33.06	34.08	16.5	15.7	16.1	34.8	36.1	35.45	41.8	44.3	43.05	15.2	13.1	14.15	32	28.1	30.05	4	7.6
NO.25	F	27	-55	-50.5	-52.75	22.9	22.7	22.8	49.3	46.3	47.8	37.1	37	37.05	7.2	7.8	7.5	29.8	29.5	29.65	4	-10.75	✔	3
NO.26	M	29	-9.82	-9.78	-9.8	13	13.2	13.1	46.9	50.1	48.5	56.2	52	54.1	13.3	11.1	12.2	44.3	39.8	42.05	4	5.6
NO.27	F	30	-25.93	-26.06	-25.995	34.3	31.7	33	51.3	55.1	53.2	45.5	43.1	44.3	6.9	5.2	6.05	39.6	36.6	38.1	4	-8.9
NO.28	F	28	-21.6	-21.5	-21.55	3.5	3.4	3.45	28.8	27.4	28.1	22	21	21.5	-0.8	-1	-0.9	21.2	23.7	22.45	4	-6.6
NO.29	F	27	32.03	32.1	32.065	16.9	17.9	17.4	43.5	41.9	42.7	37.8	39	38.4	0	0.8	0.4	38.4	37.9	38.15	4	-4.3
NO.30	F	25	0.03	0	0.015	20.6	20.7	20.65	60.9	56.6	58.75	40.2	45.3	42.75	1.5	1.7	1.6	42.5	40.1	41.3	4	-16
NO.31	F	27	-8.08	-10.13	-9.105	30	27.8	28.9	32	32.8	32.4	38.8	39.6	39.2	23	21.6	22.3	16.3	16.5	16.4	4	6.8
NO.32	F	25	-45.62	-50.46	-48.04	11.8	12.1	11.95	54.3	56.2	55.25	39.3	36.5	37.9	3.8	4	3.9	32.7	34.2	33.45	4	-17.35	✔	3
NO.33	M	18	40.81	44.85	42.83	21.5	24.6	23.05	44.4	46.8	45.6	45.2	49.1	47.15	3.2	3	3.1	43.8	43.5	43.65	4	1.55
NO.34	M	19	42.67	44.7	43.685	17.8	20.5	19.15	35.1	36.2	35.65	33.3	32	32.65	8.8	6.4	7.6	25.3	25.7	25.5	4	-3
NO.35	F	30	10.25	10.27	10.26	10.2	8.7	9.45	47.5	43.9	45.7	46	41.5	43.75	6.1	5.9	6	39	36.9	37.95	4	-1.95
NO.36	F	29	20.42	20.44	20.43	4.6	4.5	4.55	29.2	26.8	28	42	38.7	40.35	11.1	9.3	10.2	30.3	29	29.65	4	12.35
NO.37	F	24	35.92	38	36.96	15	13.6	14.3	35	38.2	36.6	25.9	27.1	26.5	-2.4	-2.7	-2.55	28.8	30.2	29.5	4	-10.1
NO.38	F	31	28.57	31.37	29.97	23.3	20.3	21.8	48.6	47.7	48.15	56.6	56.6	56.6	15.7	14	14.85	43	40.7	41.85	4	8.45	✔	3
NO.39	F	46	-9.06	-9.11	-9.085	18.3	16	17.15	50.3	46	48.15	42.4	38.9	40.65	0.9	1.4	1.15	40.8	38.5	39.65	4	-7.5
NO.40	M	37	7.4	8.23	7.815	14.2	14	14.1	44.2	44.2	44.2	39.4	43.3	41.35	7	6.9	6.95	33.7	33.7	33.7	4	-2.85
NO.41	F	36	26.23	22.64	24.435	11.3	12.3	11.8	23.7	22.9	23.3	53.1	54.7	53.9	33.1	30.7	31.9	22.2	20.7	21.45	4	30.6
NO.42	F	33	44.05	48.07	46.06	21	18.9	19.95	46	43.6	44.8	43.1	41	42.05	6.8	6.7	6.75	36.6	34.8	35.7	4	-2.75	✔	4
NO.43	F	26	17.78	17.6	17.69	2.1	1.7	1.9	24.3	24	24.15	37.5	35.2	36.35	13.6	11.5	12.55	24	25.6	24.8	4	12.2
NO.44	M	27	21.77	19.74	20.755	6	5.8	5.9	29.4	31.6	30.5	35.6	35	35.3	6.8	7.3	7.05	29.2	27.6	28.4	4	4.8
NO.45	F	30	-26.63	-27.74	-27.185	17.7	17	17.35	53.3	57.6	55.45	42.3	46.5	44.4	3.9	4	3.95	42	38.8	40.4	4	-11.05
NO.46	M	31	26	24	25	31	31.3	31.15	32.8	33.5	33.15	38.4	39.5	38.95	16.6	15.7	16.15	22.4	23	22.7	4	5.8
NO.47	F	18	45.1	49.33	47.215	32	32.1	32.05	48.9	47.6	48.25	27.9	30	28.95	-4.6	-5.3	-4.95	36	34.3	35.15	4	-19.3
NO.48	F	30	30.84	34.27	32.555	10.4	14.1	12.25	49.1	46.6	47.85	39.6	42.4	41	3.4	3.5	3.45	37	37.6	37.3	4	-6.85
NO.49	F	33	-30.12	-30.23	-30.175	18.2	18	18.1	24.9	23.6	24.25	10.1	11.4	10.75	-1	-1.2	-1.1	12.1	11.5	11.8	4	-13.5	✔	3
NO.50	F	31	17.51	15.51	16.51	12.4	12	12.2	44	42.5	43.25	35.6	37	36.3	-0.5	-0.7	-0.6	35.9	37.1	36.5	4	-6.95
NO.51	M	26	-8.43	-8.49	-8.46	32.2	32	32.1	67.1	63.7	65.4	72.3	68.7	70.5	21	18.5	19.75	48	52.3	50.15	4	5.1
NO.52	F	24	-33.1	-31.1	-32.1	0.9	1.1	1	33.2	29.4	31.3	30.8	32.1	31.45	9.9	7.5	8.7	23.2	23	23.1	4	0.15
NO.53	F	28	10.12	11.58	10.85	17	15.6	16.3	57.1	56.8	56.95	45.8	50	47.9	1.7	1.9	1.8	46.3	47	46.65	4	-9.05
NO.54	F	28	-6.42	-6.37	-6.395	15.6	13.5	14.55	37.1	39.7	38.4	44.4	49.3	46.85	12.3	14.7	13.5	32.4	33.7	33.05	4	8.45
NO.55	F	27	8.3	9.31	8.805	7.6	7.4	7.5	25.8	27.3	26.55	46.3	49.6	47.95	23	20.9	21.95	27	26.2	26.6	4	21.4
NO.56	M	27	-37.14	-37	-37.07	19.4	18.3	18.85	55.5	51.2	53.35	26.3	29	27.65	-11.2	-13.5	-12.35	41.4	40.4	40.9	4	-25.7	✔	3
NO.57	M	20	-21.1	-21.15	-21.125	7.8	7.5	7.65	34	36.3	35.15	50	49.5	49.75	24	25	24.5	24.4	24.8	24.6	4	14.6
NO.58	F	25	43.34	40.09	41.715	2.8	2.5	2.65	26.9	28.2	27.55	49.7	45.7	47.7	18.5	20.6	19.55	27.9	27.2	27.55	4	20.15
NO.59	M	37	16	15.02	15.51	7	6.9	6.95	45.6	41.2	43.4	37.3	37.7	37.5	0	0.1	0.05	38.6	37.2	37.9	4	-5.9
NO.60	M	20	26.66	27.7	27.18	23.4	23.1	23.25	38.7	41.6	40.15	56.4	61.6	59	27.6	28.8	28.2	31.5	30.1	30.8	4	18.85
NO.61	F	33	-6.4	-6.6	-6.5	19.7	21	20.35	47.1	51.3	49.2	54.6	53.1	53.85	12.3	12.6	12.45	40.4	41	40.7	4	4.65
NO.62	F	39	0	0	0	30.9	28.9	29.9	51.6	55.7	53.65	54.1	51.2	52.65	16	17.1	16.55	36	36.9	36.45	4	-1
NO.63	F	23	33.91	37.8	35.855	19.2	19.3	19.25	47.6	49.4	48.5	53.9	59	56.45	19.1	17.8	18.45	40	38.3	39.15	4	7.95
NO.64	F	29	19	17.04	18.02	15.5	16.9	16.2	55.7	57.7	56.7	54.8	57.7	56.25	9.8	10	9.9	47	42.6	44.8	4	-0.45
NO.65	M	46	12.46	12.5	12.48	28.1	28	28.05	41.6	39.2	40.4	58.5	55.1	56.8	14.8	16.5	15.65	40.1	41.4	40.75	4	16.4
NO.66	F	32	1.01	0	0.505	2.5	3.6	3.05	44.3	41.6	42.95	39.6	40.2	39.9	2.5	2.7	2.6	36.5	37.9	37.2	4	-3.05
NO.67	M	26	45.47	48.49	46.98	11.7	10.5	11.1	43.7	47.9	45.8	57.5	53.1	55.3	13.3	13.9	13.6	43.5	41	42.25	4	9.5	✔	3
NO.68	F	32	-6.9	-7.1	-7	1.9	2.3	2.1	46.5	44.3	45.4	46.1	46.4	46.25	6.5	6.9	6.7	39.6	40	39.8	4	0.85
NO.69	M	29	44.27	46.53	45.4	12.9	13.4	13.15	44.2	41.7	42.95	57.3	58.3	57.8	19.8	21	20.4	36.8	37.4	37.1	4	14.85	✔	3
NO.70	F	31	-2.11	-2.19	-2.15	21	18.8	19.9	48.3	52.8	50.55	34.2	33.9	34.05	-2.2	-2.1	-2.15	37.5	36.4	36.95	4	-16.5
NO.71	F	37	-27.84	-25.06	-26.45	8.2	8.7	8.45	69.9	74.9	72.4	77.9	76.7	77.3	15.7	16.1	15.9	62	60.9	61.45	4	4.9
NO.72	M	27	38	34.98	36.49	28.1	26.9	27.5	41	39.3	40.15	44.9	48.9	46.9	24	21.5	22.75	25.2	23.3	24.25	4	6.75
NO.73	M	32	40.31	39.21	39.76	16.2	15.9	16.05	20.1	20.3	20.2	26.3	27.4	26.85	12.2	13.9	13.05	12.9	14.7	13.8	4	6.65
NO.74	M	30	27.39	27.4	27.395	16	16	16	49.2	46.7	47.95	32.3	34.4	33.35	-6.8	-6.7	-6.75	37.6	41.3	39.45	4	-14.6
NO.75	F	22	9	9.07	9.035	2.2	1.8	2	27.6	29.9	28.75	44.4	40	42.2	17.3	17.1	17.2	25.3	24.5	24.9	4	13.45
NO.76	F	29	33.1	31.29	32.195	8	7.8	7.9	33	32.5	32.75	44.5	48.8	46.65	11.5	11	11.25	33.1	28.8	30.95	4	13.9
NO.77	M	26	36	34.94	35.47	4.1	3.6	3.85	41.1	41	41.05	28.2	29.1	28.65	-5.5	-5.7	-5.6	35	34	34.5	4	-12.4
NO.78	F	27	0.13	0	0.065	10	9.8	9.9	53	48.7	50.85	57.9	53.6	55.75	12.6	15	13.8	40.8	43.3	42.05	4	4.9
NO.79	F	30	-40.11	-43.3	-41.705	10.3	11.6	10.95	39.3	43	41.15	35	34.6	34.8	5	4.8	4.9	30	28.7	29.35	4	-6.35
NO.80	M	23	-8.73	-9.25	-8.99	27.1	24.6	25.85	37.3	37.3	37.3	29	30.2	29.6	1.2	1.5	1.35	27.5	27.1	27.3	4	-7.7
NO.81	F	26	-9.46	-8.32	-8.89	11.3	11.2	11.25	43	39.9	41.45	34.8	35.5	35.15	1.3	2.9	2.1	33.6	31	32.3	5	-6.3
NO.82	F	40	-15.04	-14.55	-14.795	39.4	43	41.2	42.9	40.8	41.85	38.4	38.6	38.5	16.5	15.7	16.1	21.1	23.6	22.35	5	-3.35
NO.83	M	31	16.5	16.82	16.66	21.1	21.1	21.1	43.8	43.4	43.6	48.3	51.1	49.7	11	11.6	11.3	37.9	37.7	37.8	5	6.1
NO.84	F	24	-43.16	-41	-42.08	20.9	22.7	21.8	35.8	36.7	36.25	23.7	21.3	22.5	-0.1	0	-0.05	22.2	23.3	22.75	5	-13.75
NO.85	M	31	23.08	22.01	22.545	31.7	29.6	30.65	26.2	28	27.1	26.9	25.6	26.25	6.4	5.9	6.15	20.2	21.3	20.75	5	-0.85
NO.86	M	35	37.1	37.01	37.055	14.7	15	14.85	37.3	37.1	37.2	32.6	31.3	31.95	-4	-4.2	-4.1	35.1	35.3	35.2	5	-5.25
NO.87	F	31	-49.88	-52.03	-50.955	15.7	17.3	16.5	51.1	47.6	49.35	39.2	38.8	39	6.9	7.3	7.1	33.2	31.1	32.15	5	-10.35	✔	4
NO.88	M	33	-7.07	-8.04	-7.555	24.6	21.7	23.15	33.6	31.9	32.75	44.8	49.1	46.95	19	21.2	20.1	27	26.5	26.75	5	14.2
NO.89	F	27	-47.19	-46.47	-46.83	18.5	16.9	17.7	33.3	33.1	33.2	32.9	31.1	32	11.1	11.7	11.4	21	19.4	20.2	5	-1.2
NO.90	M	27	61.48	65.44	63.46	18.5	16.7	17.6	10.8	10.5	10.65	44.4	45.6	45	32	29.8	30.9	13.8	15.3	14.55	5	34.35	✔	3
NO.91	M	28	-28.53	-28.45	-28.49	25.9	25.5	25.7	33.2	33.1	33.15	44.7	44.2	44.45	23	24.8	23.9	20.8	19.8	20.3	5	11.3
NO.92	M	34	-28.11	-28	-28.055	9.5	9.7	9.6	50.6	51.4	51	36.5	35.7	36.1	-4.4	-4.2	-4.3	39.6	40.8	40.2	5	-14.9
NO.93	M	22	21.81	21.8	21.805	24.3	26	25.15	54.4	54.7	54.55	33.7	33.8	33.75	-7.5	-9	-8.25	39.9	44	41.95	5	-20.8	✔	3
NO.94	F	29	3.53	3.63	3.58	22.3	23.5	22.9	34.7	37	35.85	36.6	36.8	36.7	9.8	10.2	10	26.6	26.3	26.45	5	0.85
NO.95	F	32	11.16	13.95	12.555	22.1	20.3	21.2	65.7	66.1	65.9	59.4	57	58.2	9	9.2	9.1	46.3	50.2	48.25	5	-7.7
NO.96	F	28	-11.01	-9.9	-10.455	23.7	23.8	23.75	49.8	48.7	49.25	44.6	42.7	43.65	2.9	3	2.95	38.5	42.7	40.6	5	-5.6
NO.97	M	40	29.62	29.7	29.66	39	43.4	41.2	55.1	59	57.05	48.1	47	47.55	3.6	5.5	4.55	41	44.1	42.55	5	-9.5
NO.98	F	21	-37.77	-35.06	-36.415	27	27.4	27.2	46.3	46.4	46.35	42.2	40.2	41.2	10.5	9.9	10.2	32.6	30.3	31.45	5	-5.15
NO.99	F	34	-30.92	-30.91	-30.915	24.9	25.1	25	45.2	42.5	43.85	42	41	41.5	12.1	11	11.55	29.5	29	29.25	5	-2.35	✔	3
NO.100	F	29	37.93	34.27	36.1	2.1	3.3	2.7	23.3	23.1	23.2	18.5	19	18.75	-2	-2.1	-2.05	20.6	21.5	21.05	5	-4.45
aver		28.5			3.85365			17.339			42.768			42.384			8.731			33.56		-0.384
stdev		5.41136			29.9285			9.50234			10.9719			10.897			8.91831			8.76274		11.0288

## Sheet: control
NO.	sex	age	SVA(mm)		average	TK(5-12)		average	LL		average	PI		average	PT		average	SS		average	apex	PI-LL
1	F	27	-39.36	-39.4	-39.38	13.3	13.6	13.45	63.2	59	61.1	49.2	50.3	49.75	1.6	1.5	1.55	48.6	46.4	47.5	3	-11.35
2	M	30	25	20.82	22.91	21	21.8	21.4	59.3	62.4	60.85	44.1	49	46.55	0.3	0	0.15	48	44.9	46.45	3	-14.3
3	F	29	0	0	0	36.1	32.7	34.4	64	63.8	63.9	58.1	57.7	57.9	11.3	10.9	11.1	45	49.2	47.1	3	-6
4	M	26	0	0.62	0.31	18.8	20.9	19.85	54.8	59.6	57.2	47.1	49.3	48.2	0.4	0.8	0.6	46.1	46.6	46.35	3	-9
5	M	17	39	42.4	40.7	27.2	29	28.1	67.3	71.1	69.2	63.6	62.3	62.95	13	14.3	13.65	49.5	47.5	48.5	3	-6.25
6	M	26	-17.27	-19.41	-18.34	18.1	17.8	17.95	46.6	50.4	48.5	43.3	40	41.65	1.4	1.3	1.35	39.5	39.2	39.35	4	-6.85
7	F	17	-35.2	-36.56	-35.88	18.7	21.2	19.95	59.2	55.1	57.15	51.2	55.2	53.2	16	14.8	15.4	36.4	39.9	38.15	4	-3.95
8	M	25	13.85	11.84	12.845	24.6	24.5	24.55	36	35.2	35.6	32.4	33.1	32.75	7	7.4	7.2	26.5	25.1	25.8	4	-2.85
9	F	37	3.4	3.41	3.405	6.8	5.3	6.05	39	42.4	40.7	44.6	47.9	46.25	12.6	11.8	12.2	34.2	34	34.1	4	5.55
10	F	27	58.62	56.44	57.53	39.5	40	39.75	38.7	41.1	39.9	51.6	52.3	51.95	25.1	28.8	26.95	23.3	26.3	24.8	4	12.05
11	F	43	0	-0.79	-0.395	30	32.1	31.05	50.1	47.9	49	39	39.9	39.45	0.1	0	0.05	40	38.9	39.45	4	-9.55
12	F	31	53.72	57	55.36	7.6	7	7.3	37.5	37.2	37.35	60.1	65.4	62.75	19	21.5	20.25	41.6	41.6	41.6	4	25.4
13	F	21	-24.51	-26.61	-25.56	5.1	6.3	5.7	35.8	38.6	37.2	36.5	34.9	35.7	7.7	7.4	7.55	26.6	29	27.8	4	-1.5
14	F	25	10.7	11.9	11.3	15.3	16.6	15.95	46	43.9	44.95	44.7	43.9	44.3	5	5.8	5.4	41	38.6	39.8	4	-0.65
15	M	27	41.98	44.01	42.995	19.3	17.7	18.5	47.4	43.6	45.5	56.3	52.6	54.45	15	14.1	14.55	41.1	37.4	39.25	4	8.95
16	F	22	16.5	18.71	17.605	22.5	24.4	23.45	46.7	50.2	48.45	39.9	42.7	41.3	8.7	9.4	9.05	31.8	32	31.9	4	-7.15
17	F	23	56	53.22	54.61	23.2	23.4	23.3	49.5	48	48.75	46.8	46.1	46.45	7.1	7.6	7.35	38.4	40.4	39.4	4	-2.3
18	F	25	14.01	13.1	13.555	20	20.1	20.05	48.3	48.6	48.45	47.2	50.6	48.9	13.6	11.2	12.4	34.9	38	36.45	4	0.45
19	M	27	50.03	48.89	49.46	9.3	10.1	9.7	48.3	50.1	49.2	51	48.1	49.55	6.9	5.5	6.2	45.2	41.1	43.15	4	0.35
20	M	30	-5.39	-6	-5.695	11.3	11	11.15	52.4	54.7	53.55	43.2	43	43.1	0.9	1.3	1.1	40.7	43.6	42.15	4	-10.45
21	F	18	-20.63	-21.21	-20.92	18.5	18.4	18.45	54	53.2	53.6	58.8	60	59.4	23.6	20.7	22.15	37.1	39.6	38.35	4	5.8
22	M	32	11.6	12	11.8	28.8	27.4	28.1	53.9	57.8	55.85	44.4	43.5	43.95	0.4	0.7	0.55	41.2	45.8	43.5	4	-11.9
23	M	17	43.69	46.83	45.26	26.6	28.3	27.45	50.1	54.3	52.2	47.5	42.6	45.05	2.3	2	2.15	44	41.4	42.7	4	-7.15
24	F	25	-31.15	-32.18	-31.665	34.3	36.2	35.25	58.5	56.6	57.55	41.3	44.3	42.8	5.8	5.2	5.5	38	37.4	37.7	4	-14.75
25	F	26	-47.5	-50.77	-49.135	27.9	27.7	27.8	46.8	51.5	49.15	46.3	50.5	48.4	16.6	19.1	17.85	31.1	31	31.05	4	-0.75
26	F	29	-6.9	-6.88	-6.89	31.8	30	30.9	50.9	47.2	49.05	48.6	46.9	47.75	10.8	10.4	10.6	36.5	36.8	36.65	4	-1.3
27	M	26	-9.99	-11.09	-10.54	33	32	32.5	54.1	52.4	53.25	42	40.8	41.4	4	3.9	3.95	38.8	37.4	38.1	4	-11.85
28	F	24	-10.6	-11	-10.8	35.1	33.6	34.35	51.1	50	50.55	42.4	42.3	42.35	9.7	8.2	8.95	33.3	33.2	33.25	4	-8.2
29	M	39	-16.9	-15.83	-16.365	14	15.6	14.8	48.9	53.5	51.2	43.7	40.1	41.9	4.7	5.2	4.95	37	34.9	35.95	4	-9.3
30	F	29	-10.21	-10.17	-10.19	31.3	29	30.15	55.5	51.9	53.7	37.4	37.3	37.35	1.9	2	1.95	37.4	33.5	35.45	4	-16.35
31	F	17	32.11	27.63	29.87	36.8	38.8	37.8	49.7	55.5	52.6	50.3	51	50.65	24	21.6	22.8	28.7	28.1	28.4	4	-1.95
32	M	24	3.99	4.08	4.035	17	18	17.5	51.4	49.7	50.55	44.7	47.1	45.9	3.2	3	3.1	43.6	40.8	42.2	4	-4.65
33	M	20	-52.77	-52.8	-52.785	18.5	18	18.25	50.3	54	52.15	38.2	39.5	38.85	2.1	2.2	2.15	37.3	37.5	37.4	4	-13.3
34	M	30	10.92	13.5	12.21	30.1	29	29.55	40.8	40.1	40.45	44.4	44.6	44.5	13	14	13.5	32.2	29.8	31	4	4.05
35	F	39	12	12.23	12.115	15.3	15.1	15.2	53.2	53.6	53.4	57.6	62.6	60.1	23.1	20.7	21.9	38.6	37.9	38.25	4	6.7
36	M	28	17.11	19.73	18.42	17	14.8	15.9	51	48.7	49.85	42.8	41.5	42.15	1.5	1	1.25	41.6	39.4	40.5	4	-7.7
37	F	23	6.7	6.72	6.71	17.5	15.9	16.7	8.8	11	9.9	40.8	40.7	40.75	20	19.8	19.9	20.7	21.3	21	4	30.85
38	F	27	40.1	37.08	38.59	22.1	23.7	22.9	41.1	39.2	40.15	55.3	56.6	55.95	18.8	20.6	19.7	37.4	34	35.7	4	15.8
39	F	26	-36.91	-34.76	-35.835	16.3	14.8	15.55	62.9	61	61.95	59.4	54.9	57.15	14.4	12.4	13.4	41	45.7	43.35	4	-4.8
40	F	23	-23.76	-23.59	-23.675	22.6	22.6	22.6	53.2	57	55.1	53.2	53	53.1	13	11.9	12.45	40.4	40.3	40.35	4	-2
41	M	31	-37.11	-34.87	-35.99	26.1	25.8	25.95	61.6	58.4	60	49.8	48.7	49.25	6.8	6.2	6.5	45.1	42.1	43.6	4	-10.75
42	F	30	7.2	6.66	6.93	26.7	25.6	26.15	48.3	49.7	49	51	48.2	49.6	11.5	12.1	11.8	37.8	36.9	37.35	4	0.6
43	F	27	-47.62	-49.79	-48.705	15.8	17	16.4	59	56.1	57.55	44.4	44	44.2	1	0.9	0.95	41.3	45.5	43.4	4	-13.35
44	F	30	-9.8	-10.75	-10.275	16	15.7	15.85	45.5	47.1	46.3	36.4	37.3	36.85	0.9	1.1	1	36.3	37	36.65	4	-9.45
45	M	29	0	0.02	0.01	25.9	25.8	25.85	44.4	48.6	46.5	59.2	57.3	58.25	23.8	27.4	25.6	33.6	32.2	32.9	4	11.75
46	F	34	25.24	29.8	27.52	15.9	16.1	16	53	51.2	52.1	34	37.2	35.6	4.8	4.8	4.8	30.8	32	31.4	4	-16.5
47	F	19	-27.99	-29.04	-28.515	24	21.9	22.95	56.6	52.8	54.7	53.4	51.9	52.65	14.2	13.7	13.95	39.1	40	39.55	4	-2.05
48	F	38	9.12	8.5	8.81	22.3	21.4	21.85	48.7	51.5	50.1	49.4	49.6	49.5	11.2	10.6	10.9	38.2	39.4	38.8	4	-0.6
49	F	29	14.4	11.82	13.11	13.9	17	15.45	49	49.4	49.2	44.3	47.1	45.7	7.2	6.2	6.7	38.9	38.6	38.75	4	-3.5
50	F	41	-31.61	-28.9	-30.255	29.4	29.9	29.65	56.7	52.4	54.55	44.3	44.9	44.6	5	4	4.5	39.9	40.4	40.15	4	-9.95
51	M	33	23.9	20.7	22.3	8.8	6.9	7.85	30	30.4	30.2	56.5	57.7	57.1	32	29.4	30.7	27.5	26.5	27	4	26.9
52	F	28	-24.36	-26.45	-25.405	23.1	25.4	24.25	49.2	45.3	47.25	43.2	46.1	44.65	10	9.8	9.9	34.4	35.2	34.8	4	-2.6
53	F	22	24.34	21.2	22.77	16.9	18.7	17.8	50.6	46.1	48.35	57.3	56.7	57	18.1	17.5	17.8	38	39.9	38.95	4	8.65
54	M	33	53.2	57.61	55.405	21	19.9	20.45	45.2	45.3	45.25	54.8	53.9	54.35	21.4	21.1	21.25	32.6	34.5	33.55	4	9.1
55	F	24	0	-0.01	-0.005	21.7	22.1	21.9	56.9	53.2	55.05	56.8	52.3	54.55	10.8	12.2	11.5	43.6	42.7	43.15	4	-0.5
56	M	26	0	0	0	18.2	20.1	19.15	51.7	48.4	50.05	44	42.8	43.4	8.6	8	8.3	35.2	36.8	36	4	-6.65
57	M	29	0.71	0	0.355	36	32.6	34.3	55.9	56.3	56.1	45.3	42.7	44	5.1	6.6	5.85	37.3	38.7	38	4	-12.1
58	F	32	-19.5	-20.9	-20.2	34.3	33	33.65	50.6	47.9	49.25	47.7	49.5	48.6	13	11.8	12.4	36.4	35.9	36.15	4	-0.65
59	F	40	35	37.65	36.325	14.4	15.7	15.05	46.8	47.5	47.15	53.2	56.9	55.05	17.9	15.8	16.85	38.7	36.9	37.8	4	7.9
60	M	44	0	0.1	0.05	16.8	18	17.4	60.7	62	61.35	52	52.8	52.4	10.2	13	11.6	40.2	43	41.6	4	-8.95
61	M	17	4.4	6.26	5.33	21.4	21.3	21.35	48.1	49.1	48.6	45.6	41.4	43.5	6	5.8	5.9	36	37.8	36.9	4	-5.1
62	F	18	8.99	7.9	8.445	15	14.5	14.75	36.6	39.5	38.05	46	44.6	45.3	19	19.4	19.2	25.9	27.3	26.6	4	7.25
63	M	26	-23.49	-23.54	-23.515	28	26.1	27.05	48.1	43.7	45.9	43.1	42.5	42.8	13.7	14.4	14.05	30.3	27.1	28.7	4	-3.1
64	F	30	7.6	5.62	6.61	17	18.3	17.65	44	47.4	45.7	55.5	55.8	55.65	19	20.1	19.55	35.9	37.1	36.5	4	9.95
65	M	27	-11.11	-10.79	-10.95	19	19.2	19.1	43.6	45	44.3	48.2	52.2	50.2	12.3	12.7	12.5	39	38.1	38.55	4	5.9
66	F	33	-12.3	-14.89	-13.595	6.3	6.6	6.45	43.2	42.6	42.9	39.6	40.8	40.2	1.6	1.8	1.7	37.7	38.8	38.25	4	-2.7
67	F	36	11.87	9.21	10.54	26.8	29.9	28.35	53.1	49.7	51.4	45.6	45.8	45.7	8.5	9	8.75	37.9	36.8	37.35	4	-5.7
68	F	25	-13.22	-13.41	-13.315	13.1	12.7	12.9	51	47.6	49.3	59.1	53.6	56.35	18	18.2	18.1	37.3	38.6	37.95	4	7.05
69	M	42	63.01	59	61.005	1.9	2.6	2.25	35.1	32.1	33.6	39.9	41.1	40.5	8.2	8.8	8.5	32.8	31	31.9	4	6.9
70	M	37	-27.07	-25.9	-26.485	24.6	21.2	22.9	42.5	44.2	43.35	42.4	43	42.7	11.3	12.9	12.1	29.7	31.7	30.7	5	-0.65
71	M	27	12.77	15.1	13.935	26.5	24.7	25.6	45.9	46.8	46.35	42.2	40.8	41.5	7.9	6.9	7.4	31.9	34.8	33.35	5	-4.85
72	F	17	0.03	0	0.015	19.4	17.4	18.4	33.2	37.6	35.4	40.2	39.7	39.95	10.3	9.2	9.75	30.1	30	30.05	5	4.55
73	F	26	-24.99	-27	-25.995	19.3	18.1	18.7	32.5	32.6	32.55	37.1	35.6	36.35	10.3	9.9	10.1	26	25.1	25.55	5	3.8
74	M	41	-5.2	-3.9	-4.55	10	11	10.5	45.2	43.1	44.15	38.8	41.7	40.25	6.5	6	6.25	34.2	34.2	34.2	5	-3.9
75	F	39	22.4	21.34	21.87	14.5	17.2	15.85	44	44.4	44.2	44.1	45.6	44.85	13	11.4	12.2	32.9	32.1	32.5	5	0.65
76	F	44	-26.32	-24.19	-25.255	14.4	15.7	15.05	44.4	42.7	43.55	59.9	57.8	58.85	28.3	25.6	26.95	30.8	31.7	31.25	5	15.3
77	M	17	22.9	20.13	21.515	21	20.3	20.65	53.3	54.2	53.75	49.5	49.5	49.5	7.7	8.1	7.9	43.3	40.6	41.95	5	-4.25
78	M	30	29.01	29.76	29.385	27.6	25.5	26.55	30.4	28.4	29.4	44.7	43.6	44.15	19.9	21.2	20.55	24.3	23.3	23.8	5	14.75
79	F	41	28.4	26.4	27.4	26.2	27.5	26.85	44.9	48.7	46.8	55.8	57.1	56.45	27.6	26.4	27	31.6	30.1	30.85	5	9.65
80	F	20	-37.5	-41.21	-39.355	16.6	16.2	16.4	42.9	40.1	41.5	36.1	37	36.55	9	7.9	8.45	27.6	27.5	27.55	5	-4.95
81	F	23	6.92	9.1	8.01	6.6	7.7	7.15	31.7	29	30.35	30	30.7	30.35	3.8	3.5	3.65	26.6	26.7	26.65	5	0
82	F	31	-10.21	-10.41	-10.31	28.5	31.8	30.15	45	46.4	45.7	40.1	38	39.05	9.2	10.8	10	29	29.3	29.15	5	-6.65
83	F	28	26.09	29.2	27.645	11.2	13	12.1	31.4	31.5	31.45	38.8	40.3	39.55	12	12.7	12.35	27	26.1	26.55	5	8.1
84	F	17	9.13	7.01	8.07	17.1	16.1	16.6	38.8	37.2	38	47.4	46.1	46.75	14.3	15	14.65	31.9	30.8	31.35	5	8.75
85	F	32	-54.96	-60.1	-57.53	15.5	13.1	14.3	36.5	38.4	37.45	31.5	35.2	33.35	9.4	10.5	9.95	22.7	23.8	23.25	5	-4.1
86	F	28	-14.81	-14.77	-14.79	18.3	16.1	17.2	42	39.8	40.9	31.6	32.6	32.1	2.3	2.5	2.4	28.6	31.1	29.85	5	-8.8
87	F	40	-45.33	-43.19	-44.26	14.3	16.4	15.35	37.9	33.6	35.75	37.2	38	37.6	14.3	14	14.15	23.4	23.2	23.3	5	1.85
88	M	25	4.6	3.28	3.94	17.7	17	17.35	36.7	37.8	37.25	35.6	37.4	36.5	5.5	6.1	5.8	30.4	31.7	31.05	5	-0.75
89	F	32	0.09	0	0.045	5.9	6.6	6.25	34.2	33.2	33.7	44.4	41.7	43.05	13.3	13	13.15	30.5	28.2	29.35	5	9.35
90	F	25	-20.18	-22.01	-21.095	21.2	19.7	20.45	42.9	46.5	44.7	43.9	40.1	42	12.2	13	12.6	29.4	31.6	30.5	5	-2.7
91	F	29	-31.66	-29.76	-30.71	15.1	15.1	15.1	40.8	43.3	42.05	48.7	48.1	48.4	16.2	15.5	15.85	34.2	31.9	33.05	5	6.35
92	F	47	14.07	10.12	12.095	29	27.7	28.35	35.6	32.7	34.15	39.6	36.4	38	13	11.9	12.45	26.6	26.5	26.55	5	3.85
93	M	27	-32.8	-36.12	-34.46	30.9	33	31.95	49.7	49.2	49.45	38.4	39.2	38.8	11	12.4	11.7	28	27.1	27.55	5	-10.65
94	F	30	0	-0.04	-0.02	24	27.3	25.65	39.4	41.2	40.3	37	38.2	37.6	14.8	15.1	14.95	23.2	23.1	23.15	5	-2.7
95	F	35	-4.92	-5.72	-5.32	11.4	12.5	11.95	43.1	47	45.05	43.8	47.1	45.45	10.6	11.1	10.85	35.1	33.3	34.2	5	0.4
96	F	34	9	8.35	8.675	16.4	15	15.7	44.8	44.7	44.75	49	47.8	48.4	14.7	16.4	15.55	33.6	33.9	33.75	5	3.65
97	F	41	-19.54	-19.43	-19.485	36.1	39	37.55	44.3	44.3	44.3	27	30.1	28.55	4.7	5.3	5	23.6	23.7	23.65	5	-15.75
98	M	17	-27	-26.2	-26.6	17.2	15.4	16.3	40.6	45.1	42.85	40.2	41.8	41	8.5	8.9	8.7	33.3	33.1	33.2	5	-1.85
99	F	24	-34.04	-36.53	-35.285	11.2	13.1	12.15	27.7	29.4	28.55	35.3	37.8	36.55	15.2	16.8	16	18.8	21	19.9	5	8
100	F	22	11.83	9.22	10.525	16.3	14.2	15.25	35.6	34.7	35.15	38.7	40	39.35	9.3	10.5	9.9	28.6	28.6	28.6	5	4.2
	aver	28.56			-0.36045			20.4535			46.413			45.6755			10.922			34.785		-0.7375
	stdev	7.22275			26.7815			8.02128			9.07143			7.49408			6.9545			6.47686		9.14531
